# Supplementary material
Source: publisher figshare collection journal article supplement (https://acs.figshare.com/ndownloader/files/5135386)
Supplement: Supplementary file 1 [file 5135386]

## **Supporting Information**

**of**

# **Alternating Copolymerization of Ethylene with 7- Methylenebicyclo[4.1.0]heptane Promoted by Cobalt Complex. Highly Regulated Structure and Thermal Rearrangement of the Obtained Copolymer.**

*Daisuke Takeuchi and Kohtaro Osakada\**

Chemical Resources Laboratory, Tokyo Institute of Technology, 4259 Nagatsuda,

Midori-ku, Yokohama 226-8503, Japan.

kosakada@res.titech.ac.jp

## Experimental Procedures

### General Method

Ethylene and ethylene-d<sub>4</sub> (C<sub>2</sub>D<sub>4</sub>), anhydrous toluene and deuterated 1,1,2,2-tetrachloroethane (C<sub>2</sub>D<sub>2</sub>Cl<sub>4</sub>) were used as received. Cobalt complex was prepared according to the reported procedure.<sup>1</sup> Modified methylaluminoxane (MMAO) was purchased from TOSOH FINECHEM Co. Ltd. and used as received. 7-Methylenebicyclo[4.1.0]heptane<sup>2</sup> and 7,7-dimethylbicyclo[4.1.0]heptane<sup>3</sup> were prepared according to the reported procedure.

NMR spectra (<sup>1</sup>H, <sup>2</sup>H and <sup>13</sup>C) were recorded on a Varian Mercury 300 or JEOL JNM-500 spectrometer where the chemical shifts were determined with respect to C<sub>2</sub>D<sub>2</sub>Cl<sub>4</sub> ( $\delta$ 5.91) for <sup>1</sup>H and <sup>2</sup>H, and C<sub>2</sub>D<sub>2</sub>Cl<sub>4</sub> ( $\delta$ 74.2) for <sup>13</sup>C. Gel permeation chromatography (GPC) was performed at 40 °C on a TOSOH HLC-8020 high-speed liquid chromatograph system equipped with a differential refractometer detector and a variable-wavelength UV-vis detector, using tetrahydrofuran as eluent at a flow rate of 0.6 mL min<sup>-1</sup> with TSKgel SuperHM-L and SuperHM-M columns. The molecular weights were calibrated based on polystyrene standards. DSC and TG were recorded on Seiko DSC6200R and Seiko TG/DTA6200R.

- 
1. Britovsek, G. J. P.; Bruce, M.; Gibson, V. C.; Kimberley, B. S.; Maddox, P. J.; Mastroianni, S.; McTavish, S. J.; Redshaw, C.; Solan, G. A.; Strömberg, S.; White, A. J. P.; Williams, D. J. *J. Am. Chem. Soc.* **1999**, *121*, 8728.
  2. Arora, S.; Binger, P. *Synthesis*, **1974**, 801.
  3. Corey, E. J.; Posner, G. H. *J. Am. Chem. Soc.* **1968**, *90*, 5615.

### Copolymerization of Ethylene with 7-Methylenebicyclo[4.1.0]heptane

Typically, a toluene solution (3.7 mL) of Co complex (0.0083 mmol, 5 mg) and 7-methylenebicyclo[4.1.0]heptane (**1**) (1.66 mmol, 0.18 g) in a 25-mL Schlenk flask, was subjected to a freeze-pump-thaw cycle, and back-filled with ethylene. Toluene solution of MMAO (1.3 mL, 2.5 mmolAl) was added by a syringe, and the mixture was stirred for 1 h under ethylene flow (1 mL/min) at -40 °C. The reaction mixture was quenched by adding EtOH (ca. 1 mL). The produced polymer was isolated by pouring the reaction mixture into a large amount of HCl/methanol. Thus formed white precipitate was collected by filtration and dried in vacuo at room temperature. Yield = 0.18 g.  $^1\text{H}$  NMR ( $\text{C}_2\text{D}_2\text{Cl}_4$ ):  $\delta$  0.46 (2H, s, CH), 1.15 (8H, br,  $\text{CH}_2$ ), 1.26 (4H, br,  $\text{CH}_2$ ), and 1.74 (2H, s, CH (cyclohexane)).  $^{13}\text{C}\{^1\text{H}\}$  NMR ( $\text{C}_2\text{D}_2\text{Cl}_4$ ):  $\delta$  19.2 (CH), 19.5 ( $\text{CH}_2$  (cyclohexane)), 22.7 ( $\text{CH}_2$  (cyclohexane)), 23.0 ( $\text{CH}_2$ ), 25.2 (C), 26.4 ( $\text{CH}_2$ ), and 40.2 ( $\text{CH}_2$ ).

### Copolymerization of $\text{C}_2\text{D}_4$ with 7-Methylenebicyclo[4.1.0]heptane

Typically, a toluene solution (3.7 mL) of Co complex (0.0083 mmol, 5 mg) and 7-methylenebicyclo[4.1.0]heptane (**1**) (1.66 mmol, 0.18 g) in a 25-mL Schlenk flask, was subjected to a freeze-pump-thaw cycle, and back-filled with  $\text{C}_2\text{D}_4$ . Toluene solution of MMAO (1.3 mL, 2.5 mmolAl) was added by a syringe, and the mixture was stirred for 1 h under  $\text{C}_2\text{D}_4$  atmosphere (1 atm) at -40 °C. The reaction mixture was quenched by adding EtOH (ca. 1 mL). The produced polymer was isolated by pouring the reaction mixture into a large amount of HCl/methanol. Thus formed white precipitate was collected by filtration and dried in vacuo at room temperature. Yield = 0.18 g.  $^1\text{H}$  NMR ( $\text{C}_2\text{D}_2\text{Cl}_4$ ):  $\delta$  0.51 (2H, s, CH), 1.18 (6H, br,  $\text{CH}_2$ ), 1.30 (2H, br,  $\text{CH}_2$ ), and 1.79 (2H, s, CH (cyclohexane)).  $^{13}\text{C}\{^1\text{H}\}$  NMR ( $\text{C}_2\text{D}_2\text{Cl}_4$ ):  $\delta$  19.1 (CH), 19.5 ( $\text{CH}_2$  (cyclohexane)), 22.1 ( $\text{CD}_2$ ), 22.7 ( $\text{CH}_2$  (cyclohexane)), 25.0 (C), 26.1 ( $\text{CH}_2$ ), and 39.1 ( $\text{CD}_2$ ).

### Homopolymerization of 7-methylenebicyclo[4.1.0]heptane at $-40\text{ }^{\circ}\text{C}$ .

Typically, to a 25-mL Schlenk flask containing a toluene solution (3.7 mL) of Co complex (0.0083 mmol, 5 mg), 7-Methylenebicyclo[4.1.0]heptane (**1**) (1.66 mmol, 0.18 g), and a magnetic stirring bar under Ar, was added toluene solution of MMAO (1.3 mL, 2.5 mmolAl) by a syringe, and the mixture was stirred at  $-40\text{ }^{\circ}\text{C}$  for 30 min. The reaction mixture was quenched by adding EtOH (ca. 1 mL). Pouring the reaction mixture into a large amount of HCl/methanol formed the polymer as a white precipitate, which was collected by filtration and dried in vacuo at room temperature. Yield = 0.028 g (16%)

### Thermal Isomerization of **2**

A  $\text{C}_2\text{D}_2\text{Cl}_4$  solution (0.5 mL) of **2** (0.05 g) was heated at  $130\text{ }^{\circ}\text{C}$  for 12 h. The solution was subjected to NMR and GPC analyses directly.  $M_n = 5800$ ,  $M_w/M_n = 1.69$ .  $^1\text{H}$  NMR ( $\text{C}_2\text{D}_2\text{Cl}_4$ ):  $\delta$  1.9-2.2 (m,  $\text{CH}_2$ ), 1.12 (br, CH), 1.9-2.2 (m,  $\text{CH}_2$ ), 2.41 (m, CH (cis)), 2.75 (m, CH (trans)), and 5.09, 5.13 (s,  $\text{CH=}$ ).  $^{13}\text{C}\{^1\text{H}\}$  NMR ( $\text{C}_2\text{D}_2\text{Cl}_4$ ):  $\delta$  26.7 ( $\text{CH}_2$  (cyclohexane)), 26.8 ( $\text{CH}_2$  (cyclohexane)), 27.3 ( $\text{CH}_2\text{CH=}$  (cis)), 27.3 ( $\text{CH}_2\text{CH=}$  (trans)), 30.9 ( $=\text{CCH}_2$  (cis)), 31.9 ( $\text{CH}_2$  (cyclohexane)), 32.1 ( $\text{CH}_2$  (cyclohexane)), 33.4 ( $=\text{CCH}_2$  (trans)), 41.0 (CH (trans)), 45.4 (CH (cis)), 123.4 ( $\text{CH=}$ ), and 144.8 ( $=\text{C}$ ).

### Preparation of 7,7-Dimethylbicyclo[4.1.0]heptane<sup>3</sup>

To a 25-mL Schlenk flask containing CuI (3.36 g, 17.5 mmol),  $\text{Et}_2\text{O}$  (70 mL), and a magnetic stirring bar, was added MeLi (35 mL, 1.0 M solution in ether) by a syringe under Ar at  $-45\text{ }^{\circ}\text{C}$ . The mixture was stirred for 10 min. An  $\text{Et}_2\text{O}$  solution (3.5 mL) of 7,7-dibromobicyclo[4.1.0]heptane (0.9 g, 3.5 mmol) was added to the mixture. After stirring for 1 h at  $-45\text{ }^{\circ}\text{C}$  and for 18 h at  $0\text{ }^{\circ}\text{C}$ , MeI (3.5 mL, 56 mmol) was added to the mixture at  $0\text{ }^{\circ}\text{C}$  and stirred for 16 h. The resulting mixture was poured into water (ca.

50 mL). Organic products were extracted with Et<sub>2</sub>O, and the Et<sub>2</sub>O layer was dried with MgSO<sub>4</sub>. The volatile fraction was removed by evaporation to afford colorless oil (0.277 g). The <sup>1</sup>H NMR analysis indicated the formation of 7,7-dimethylbicyclo[4.1.0]heptane in ca. 80% purity. The compound was employed for thermal isomerization reaction without further purification. <sup>1</sup>H NMR (C<sub>2</sub>D<sub>2</sub>Cl<sub>4</sub>): δ 0.45 (2H, d, *J* = 7.5 Hz, CH), 0.87 (3H, s, CH<sub>3</sub>), 0.89 (3H, s, CH<sub>3</sub>), 1.09 (4H, m, CH<sub>2</sub>), 1.28 (2H, m, CH<sub>2</sub>), and 1.74 (2H, m, CH<sub>2</sub>). <sup>13</sup>C{<sup>1</sup>H} NMR (C<sub>2</sub>D<sub>2</sub>Cl<sub>4</sub>): δ 15.7 (CH<sub>3</sub>), 17.4 (C), 19.2 (CH), 19.5 (CH<sub>2</sub> (cyclohexane)), 21.5 (CH<sub>2</sub> (cyclohexane)), and 29.8 (CH<sub>3</sub>).

### Thermal Isomerization of 7,7-Dimethylbicyclo[4.1.0]heptane

C<sub>2</sub>D<sub>2</sub>Cl<sub>4</sub> solution (0.5 mL) of 7,7-dimethylbicyclo[4.1.0]heptane (0.05 g) was heated at 130 °C for 12 h. The solution was subjected to NMR analysis without isolation of the product. The main product was assigned by comparison of the NMR data with those of 1-isopropylcyclohexane reported by Apparau and Crandall (*J. Org. Chem.* **1984**, 49, 2125). <sup>1</sup>H NMR (C<sub>2</sub>D<sub>2</sub>Cl<sub>4</sub>): δ 0.91 (6H, d, *J* = 7 Hz, CH<sub>3</sub>), 1.47 (2H, m, CH<sub>2</sub>), 1.54 (2H, m, CH<sub>2</sub>), 1.86 (2H, s, CH<sub>2</sub>), 1.92 (2H, s, CH<sub>2</sub>), 2.07 (1H, m, *J* = 7 Hz, CH), and 5.31 (1H, s, =CH). <sup>13</sup>C{<sup>1</sup>H} NMR (C<sub>2</sub>D<sub>2</sub>Cl<sub>4</sub>): δ 21.7 (CH<sub>3</sub>), 23.2 (CH<sub>2</sub> (cyclohexane)), 23.5 (CH<sub>2</sub> (cyclohexane)), 25.6 (CH<sub>2</sub> (cyclohexane)), 26.3 (CH<sub>2</sub> (cyclohexane)), 35.5 (CH), 118.5 (=CH), and 143.8 (C=).

### Preparation of 7,7-Dibutylbicyclo[4.1.0]heptane

To a 25-mL Schlenk flask containing CuI (3.36 g, 17.5 mmol), Et<sub>2</sub>O (70 mL), and a magnetic stirring bar under Ar at –45 °C, was successively added n-BuLi (22 mL, 1.6 M solution in hexane) and Et<sub>2</sub>O solution (3.5 mL) of 7,7-dibromobicyclo[4.1.0]heptane (0.9 g, 3.5 mmol) by a syringe. The mixture was stirred at –45 °C for 1 h and 0 °C for 18 h. n-BuI (6.4 mL, 56 mmol) was added to the mixture at 0 °C and stirred for 16 h. The mixture was poured into water, extracted with Et<sub>2</sub>O, and dried with MgSO<sub>4</sub>. The

volatile fraction was evaporated to afford colorless oil (0.7 g, ca. 70% purity by NMR). It was used for thermal isomerization reaction without further purification.  $^1\text{H}$  NMR ( $\text{C}_2\text{D}_2\text{Cl}_4$ ):  $\delta$  0.45 (2H, s, CH), 0.81 (3H, s,  $\text{CH}_3$ ), 0.85 (3H, s,  $\text{CH}_3$ ), 1.1-1.4 (18H, m,  $\text{CH}_2$ ), and 1.74 (2H, s,  $\text{CH}_2$ ).  $^{13}\text{C}\{^1\text{H}\}$  NMR ( $\text{C}_2\text{D}_2\text{Cl}_4$ ):  $\delta$  14.7 ( $\text{CH}_3$ ), 19.1 (CH), 19.5 ( $\text{CH}_2$  (cyclohexane)), 22.7 ( $\text{CH}_2$  (cyclohexane)), 23.8 ( $\text{CH}_3\text{CH}_2$ ), 25.2 (C), 25.9 ( $\text{CH}_2\text{C}$ ), 28.7 ( $\text{CH}_2$ ), 28.8 ( $\text{CH}_2$ ), and 39.3 ( $\text{CH}_2\text{C}$ ).

### Thermal Isomerization of 7,7-Dibutylbicyclo[4.1.0]heptane

$\text{C}_2\text{D}_2\text{Cl}_4$  solution (0.5 mL) of 7,7-dimethylbicyclo[4.1.0]heptane (0.1 g) was heated at 130 °C for 12 h. The solution was subjected to NMR analysis without isolation of the product. The main product was assigned to be (*E*)-5-cyclohexyl-4-nonene by comparison of the NMR results with the reported data of (*E*)- and (*Z*)-2-cyclohexyl-2-butene (Bangerter, F.; Karpf, M.; Meier, L. A.; Rys, P.; Skrabal, P. *J. Am. Chem. Soc.* **1998**, *120*, 10653 (Supporting Information)).  $^1\text{H}$  NMR ( $\text{C}_2\text{D}_2\text{Cl}_4$ ):  $\delta$  0.81 (6H, t,  $J = 7$  Hz,  $\text{CH}_3$ ), 1.10 (2H, m,  $\text{CH}_2$  (cyclohexane)), 1.20 (10H, m,  $\text{CH}_2$ ), 1.50 (2H, m,  $\text{CH}_2$  (cyclohexane)), 1.73 (4H, m,  $=\text{C}-\text{CH}_2$ ), 1.92 (3H, m, CH,  $\text{CH}_2-\text{CH}=\text{}$ ), and 5.28 (1H, s,  $\text{CH}=\text{}$ ).  $^{13}\text{C}\{^1\text{H}\}$  NMR ( $\text{C}_2\text{D}_2\text{Cl}_4$ ):  $\delta$  14.5 ( $\text{CH}_3$ ), 23.2 ( $\text{CH}_3\text{CH}_2$ ), 23.4 ( $\text{CH}_2$ ), 23.5 ( $\text{CH}_2$ ), 24.3 ( $\text{CH}_2\text{CH}=\text{}$ ), 25.7 ( $\text{CH}_2$  (cyclohexane)), 30.2 ( $=\text{CCH}_2$ ), 33.6 ( $\text{CH}_2$  (cyclohexane)), 47.9 (CH), 122.1 ( $\text{CH}=\text{}$ ), and 140.0 ( $=\text{C}$ ).

Table 1. Copolymerization of ethylene with 7-methylenebicyclo[4.1.0]heptane (**1**) by Co complexes

| run | solvent / mL | temp. / °C | time / min | yield / g |
|-----|--------------|------------|------------|-----------|
| 1   | 5            | -40        | 60         | 0.18      |
| 2   | 5            | -40        | 120        | 0.17      |
| 3   | 5            | -40        | 10         | 0.105     |
| 4   | 2.5          | -40        | 60         | 0.16      |
| 5   | 5            | 0          | 60         | 0.068     |
| 6   | 5            | 0          | 120        | 0.051     |
| 7   | 5            | r.t.       | 30         | 0.014     |
| 8   | 5            | r.t.       | 60         | 0.033     |

Reaction conditions: Co complex = 5 mg (0.0083 mmol), **1** = 0.18 g (1.66 mmol), ethylene = 1 atm

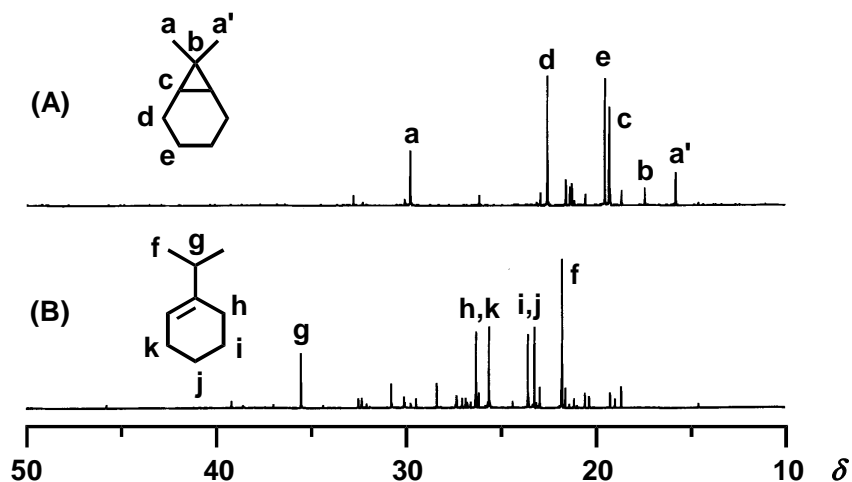

**Figure 1.**  $^{13}\text{C}\{^1\text{H}\}$  NMR spectra of (A) 7,7-dimethylbicyclo[4.1.0]heptane and (B) the product after heating the solution at 130 °C for 12 h.

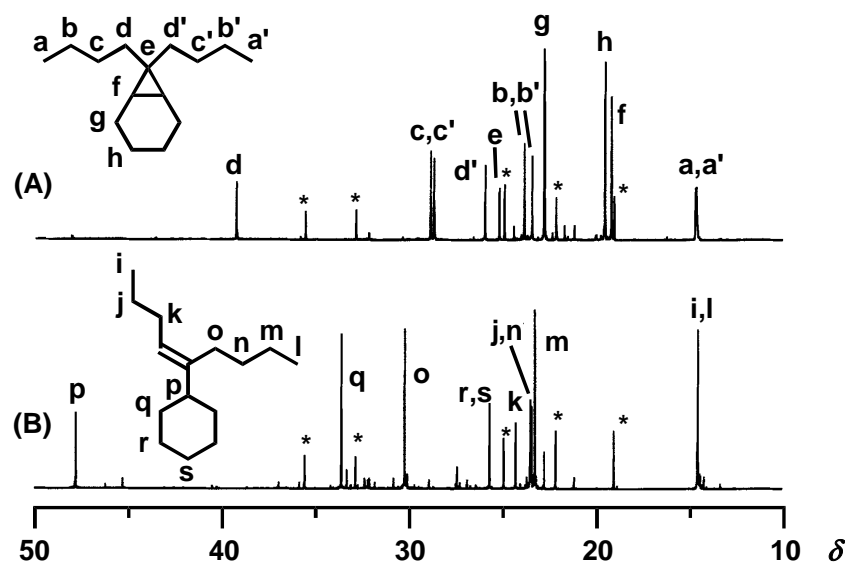

**Figure 2.**  $^{13}\text{C}\{^1\text{H}\}$  NMR spectra of (A) 7,7-dibutylbicyclo[4.1.0]heptane and (B) the product after heating the solution at 130 °C for 12 h. The peaks with asterisks are due to impurities.



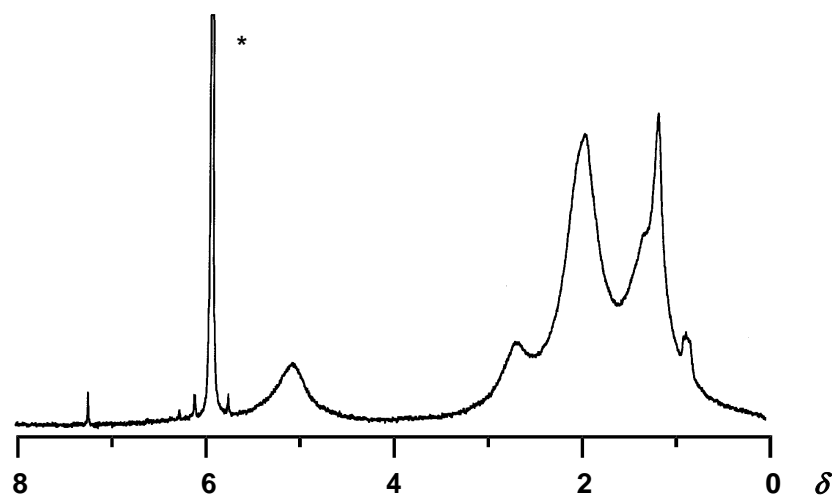

**Figure 3.**  $^2\text{H}$  NMR spectrum of **3-d** in  $\text{CHCl}_3$  at room temperature. The peak with asterisk is due to solvent ( $\text{C}_2\text{D}_2\text{Cl}_4$ ).

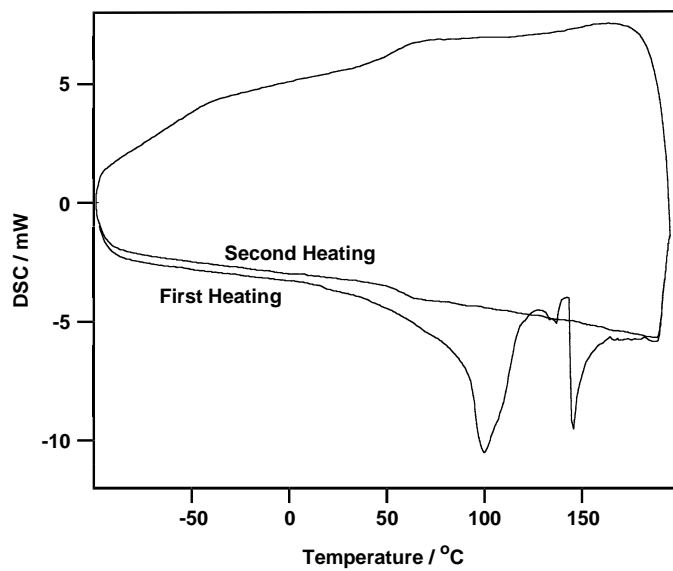

**Figure 4.** DSC chart of **2**.
